# Supplementary material for: Nitrogen-rich cobalt metal–organic framework as a heterogeneous catalyst for the degradation of organic dye pollutants in water via peroxymonosulfate activation
Source: Royal Society of Chemistry journal article supplement (doi:10.1039/d4nj02613f), 2024-01-01
Supplement: d4nj02613f1.pdf [file d4nj02613f1.pdf]

## Supporting Information

### **Nitrogen-rich cobalt metal-organic framework as heterogeneous catalyst to degrade organic dye pollutants in water via peroxymonosulfate activation**

Wei Xie<sup>a</sup>, Yuan Yuan<sup>a</sup>, Guang-Juan Xu<sup>a</sup>, Shu-Ran Zhang<sup>a</sup>, Yan-Hong Xu<sup>\*a</sup>, and Zhong-Min Su<sup>\*b</sup>

*<sup>a</sup> Key Laboratory of Preparation and Applications of Environmental Friendly Materials (Jilin Normal University), Ministry of Education, Changchun 130103, Jilin, PR China*

*<sup>b</sup> Institute of Functional Material Chemistry, Faculty of Chemistry, Northeast Normal University, Changchun 130024, Jilin (P. R. China)*

*\* Corresponding author*

*E-mail: xuyh198@163.com; zmsu@nenu.edu.cn*

## S1. Materials and Methods

All chemical reagents for synthesis were purchased commercially and were used directly without further purification. Powder X-ray diffraction (PXRD) data were obtained on a Rigaku model RINT Ultima III diffractometer by depositing powder on glass substrate, from  $2\theta = 3^\circ$  up to  $50^\circ$  with  $0.02^\circ$  increment. X-ray photoelectron spectra (XPS) were recorded on an ESCALAB250Xi electron spectrometer (Thermo Fisher Scientific Inc., Waltham, MA, USA). The UV-vis absorption spectra were carried out using Jasco V-770 spectrometer (JAPAN) spectrophotometer. The metal ion content in the solution is tested by Inductively coupled plasma (ICP) mass spectrometer (NexION 350X, United States). Total organic carbon was analyzed with a TOC analyzer (Shimadzu TOC-L-CPH). Electron paramagnetic resonance (EPR) spectra were recorded on a Bruker A300 spectrometer.

## S2. Synthesis of $\text{Co}_3\text{-btca}$

$\text{Co}_3\text{-btca}$  was synthesized according to the reported procedure with modification<sup>1</sup>. A mixture of  $\text{Co}(\text{NO}_3)_2 \cdot 6\text{H}_2\text{O}$  (58 mg, 0.2 mmol) and  $\text{H}_2\text{btca}$  (benzotriazole-5-carboxylic acid, 20 mg, 0.12 mmol) was dissolved in N,N-dimethylacetamide (DMA) and  $\text{H}_2\text{O}$  (6 mL, 1:1, V/V) solution. The final mixture solution was sealed in a 10 mL Teflon-lined stainless autoclave and heated at  $130^\circ\text{C}$  for 72 hours. After the reaction, the autoclave was then cooled slowly down to the room temperature. The precipitates were washed by deionized water for three times and purple crystal Co-MOF  $\text{Co}_3\text{-btca}$  was collected.

## S3. Heterogeneous MV and RhB degradation by $\text{Co}_3\text{-btca}$ /PMS

In this study, model pollutants RhB (Rhodamine B) and MV (Methyl Violet) are chosen to evaluate the catalytic performance of  $\text{Co}_3\text{-btca}$  for PMS activation. The oxidation degradation experiments contain 100 mL of dye (RhB or MV) solution with the concentration of 20 mg/L, catalyst  $\text{Co}_3\text{-btca}$  (10 mg) and PMS (1.0 mM) in 250 mL reactor. The experiments were carried out at  $20^\circ\text{C}$  under ambient atmospheric condition. Before addition of PMS, the solution including  $\text{Co}_3\text{-btca}$  catalyst and dye solution was magnetically stirred for 10 min to establish adsorption-desorption equilibrium. And then we added PMS to the system. After desired intervals, 1.0 mL

of the degraded solution was taken with adding 1.0 mL of 6 mM Na<sub>2</sub>S<sub>2</sub>O<sub>3</sub> aqueous solution to quench the reaction and filtered with a 0.22 - $\mu$ m filter to separate the supernatant liquid from catalyst for analysis. The RhB and MV dye concentrations were analyzed by using the UV-visible spectrophotometer at their maximum absorbance wavelengths of 554 nm and 584 nm. The influence factors of dye concentration, catalyst loading, PMS concentration, and temperature were carried out to assess the performance of dye degradation. To test the recyclability of **Co<sub>3</sub>-btca** catalyst, after degradation each experiment, the **Co<sub>3</sub>-btca** was collected by centrifugation, washed with water and ethanol many times and dried at 70 °C for 12 h. Then the same catalyst was used for the next run catalytic degradation experiment.

A general pseudo-first-order reaction was used to estimate the degradation reaction rate as shown below:

$$\ln(C/C_0) = -kt$$

where  $C_0$  and  $C$  are the initial concentration and the concentration at various time, respectively,  $k$  is the first order reaction kinetic constant of MV and RhB removal ( $\text{min}^{-1}$ ).

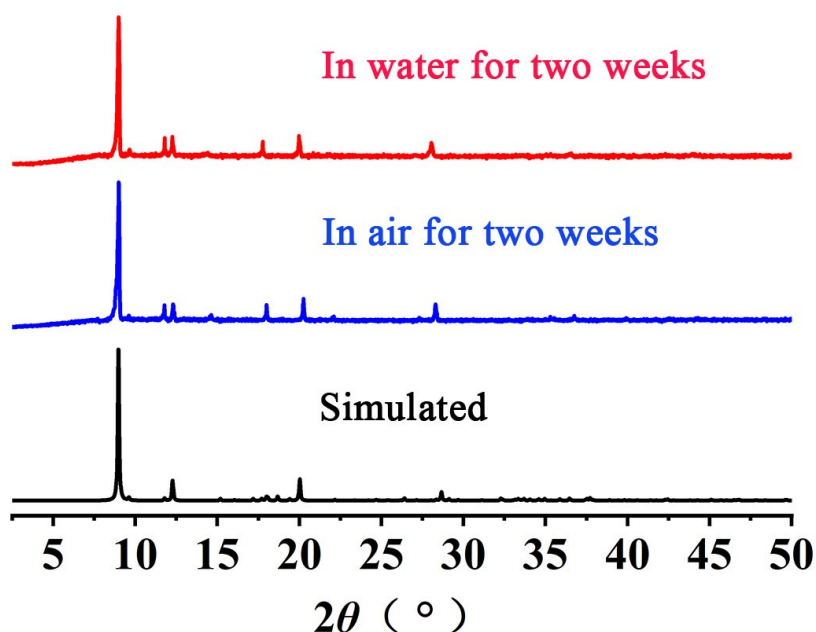

**Fig. S1** The PXR D patterns of the **Co<sub>3</sub>-btca**. Black: simulated, blue: exposed in air for two weeks, and red: exposed in water for two weeks, respectively.

**Table S1** Comparison of different Co-containing catalysts towards pollutants for PMS activation.

| Catalyst                               | pollutant     | PMS dose | Catalyst dose (g/L) | Degradation efficiency | Ref.      |
|----------------------------------------|---------------|----------|---------------------|------------------------|-----------|
| HCo <sub>3</sub> O <sub>4</sub> /C     | BPA, 87.6 μm  | 325.3 μM | 0.1                 | 97%, 4 min             | 2         |
| CoMn <sub>2</sub> O <sub>4</sub>       | SA, 10 mg/L   | 0.1 g/L  | 0.05                | 100%, 30 min           | 3         |
| Fe <sub>3</sub> Co <sub>7</sub> @C-650 | BPA, 20 mg/L  | 0.2 g/L  | 0.1                 | 98%, 30 min            | 4         |
| Co-MOF                                 | MO, 20 mg/L   | 1.0 mM   | 0.1                 | 98.56%, 4.5 min        | 5         |
| ZIF-67/PAN                             | AY, 500 mg/L  | 0.5 g/L  | 0.233               | 95.1%, 10 min          | 6         |
| ZIF-67                                 | RhB, 50 mg/L  | 0.15 g/L | 0.01                | 80%, 60 min            | 7         |
| CuCo-MOF-74                            | MB, 0.2 mM    | 2.0 mM   | 0.05                | 100%, 30 min           | 8         |
| MCNC                                   | RhB, 10 mg/L  | 0.05 g/L | 0.01                | 90%, 10 min            | 9         |
| NiCo <sub>4</sub> -LDH                 | CIP, 50 mg/L  | 1.25 g/L | 0.25                | 95%, 10 min            | 10        |
| 10%-AZCN                               | LVFX, 10 mg/L | 2.0 mM   | 1.0                 | 87.3%, 60 min          | 11        |
| JLNU-500                               | RhB, 50 mg/L  | 1.0 mM   | 0.1                 | 99.8%, 6 min           | 12        |
| Co <sub>3</sub> -btca                  | MV, 20 mg/L   | 1.0 mM   | 0.1                 | 99.78%, 9 min          | this work |
| Co <sub>3</sub> -btca                  | RhB, 20 mg/L  | 1.0 mM   | 0.1                 | 99.58%, 15 min         | this work |

BPA, bisphenol A, SA, sulfanilamide, AY, acid yellow, MO, methyl orange, MB, methylene blue, CIP, ciprofloxacin, LVFX, levofloxacin, MV, Methyl Violet, RhB, rhodamine B.

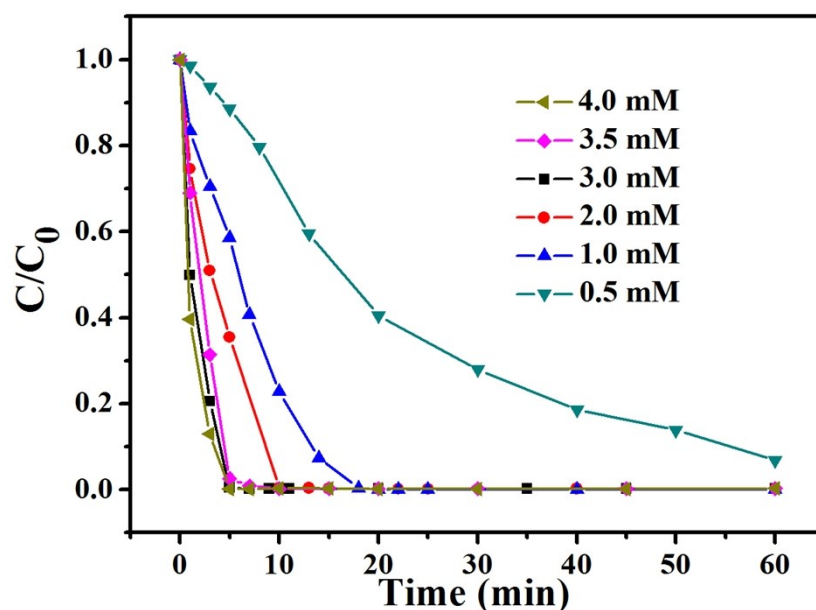

**Fig. S2** Effect of PMS concentration on the degradation of RhB. Experiment

condition:  $[\text{RhB}] = 20 \text{ mg L}^{-1}$ ,  $[\text{Co}_3\text{-btca}] = 10 \text{ mg}$ ,  $[\text{PMS}] = 1.0 \text{ mM}$ ,  $T = 20 \text{ }^\circ\text{C}$ .

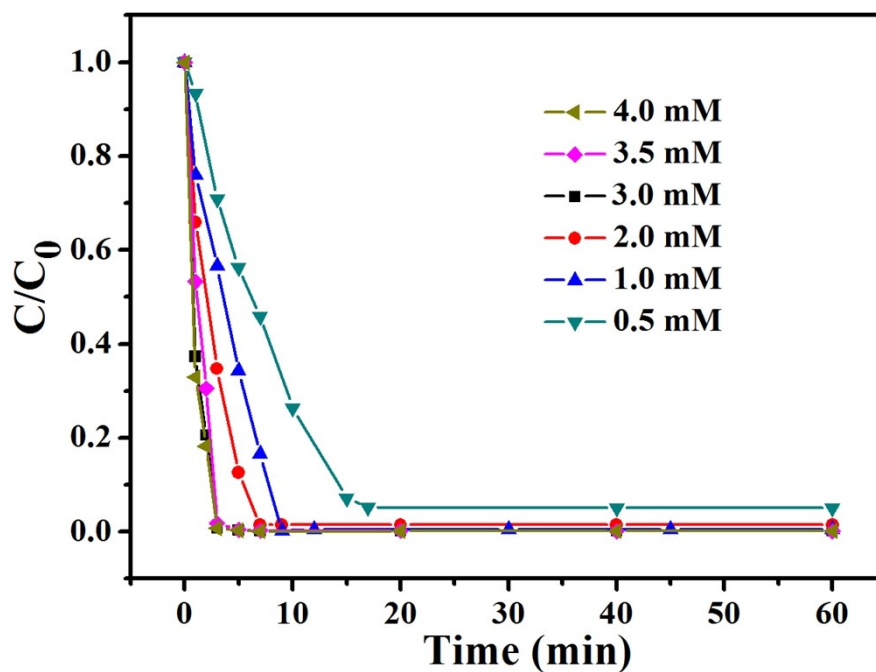

**Fig. S3** Effect of PMS concentration on the degradation of MV. Experiment condition:

$[\text{MV}] = 20 \text{ mg L}^{-1}$ ,  $[\text{Co}_3\text{-btca}] = 10 \text{ mg}$ ,  $[\text{PMS}] = 1.0 \text{ mM}$ ,  $T = 20 \text{ }^\circ\text{C}$ .

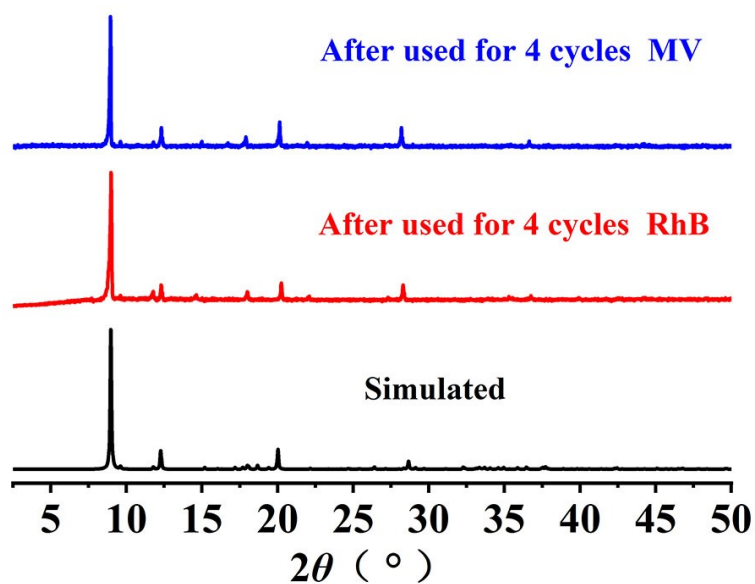

**Fig. S4** The PXRD patterns of  $\text{Co}_3\text{-btca}$  after used for 4 cycles.

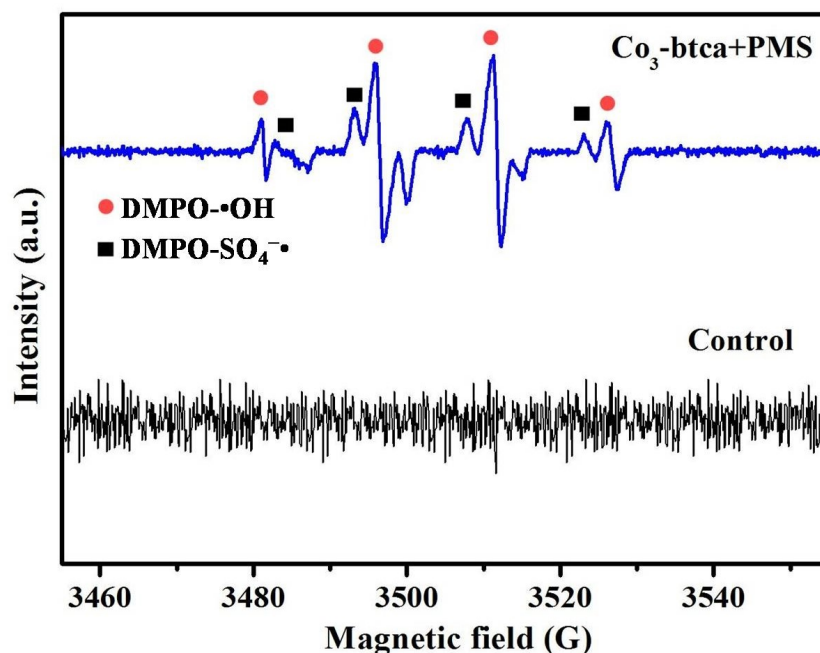

Fig. S5 EPR spectra obtained using DMPO as spin-trapping agent.

#### References:

1. J.-T. Yuan, J.-J. Hou, X.-L. Liu, Y.-R. Feng, X.-M. Zhang, Optimized trimetallic benzotriazole-5-carboxylate MOFs with coordinately unsaturated active sites as an efficient electrocatalyst for the oxygen evolution reaction. *Dalton Trans.*, 2020, **49**, 750-756.
2. M. A. N. Khan, P. K. Klu, C. Wang, W. Zhang, R. Luo, M. Zhang, J. Qi, X. Sun, L. Wang, J. Li, Metal-organic framework-derived hollow  $\text{Co}_3\text{O}_4$ /carbon as efficient catalyst for peroxymonosulfate activation. *Chem. Eng. J.*, 2019, **363**, 234-246.
3. C. X. Li, C. B. Chen, J. Y. Lu, S. Cui, J. Li, H. Q. Liu, W. W. Li, F. Zhang, Metal organic framework-derived  $\text{CoMn}_2\text{O}_4$  catalyst for heterogeneous activation of peroxymonosulfate and sulfanilamide degradation. *Chem. Eng. J.*, 2018, **337**, 101-109.
4. X. Li, A. I. Rykov, B. Zhang, Y. Zhang, J. Wang, Graphene encapsulated  $\text{Fe}_x\text{Co}_y$  nanocages derived from metal-organic frameworks as efficient activators for peroxymonosulfate. *Catal. Sci. Technol.*, 2016, **6**, 7486-7494.
5. W. Xie, Y. Yuan, W. Jiang, S.-R. Zhang, G.-J. Xu, Y.-H. Xu, Z.-M. Su, Heterogeneous activation of peroxymonosulfate by stable Co-MOF for the efficient

- degradation of organic dye pollutants. *CrystEngComm*, 2022, **24**, 6786-6792.
6. C. Wang, H. Wang, R. Luo, C. Liu, J. Li, X. Sun, J. Shen, W. Han, L. Wang, Metal-organic framework one-dimensional fibers as efficient catalysts for activating peroxymonosulfate. *Chem. Eng. J.*, 2017, **330**, 262-271.
  7. K.-Y. A. Lin, H. A. Chang, Zeolitic Imidazole Framework-67 (ZIF-67) as a heterogeneous catalyst to activate peroxymonosulfate for degradation of Rhodamine B in water. *J. Taiwan Inst. Chem. E.*, 2015, **53**, 40-45.
  8. H. Li, Z. Yang, S. Lu, L. Su, C. Wang, J. Huang, J. Zhou, J. Tang, M. Huang, Nano-porous bimetallic CuCo-MOF-74 with coordinatively unsaturated metal sites for peroxymonosulfate activation to eliminate organic pollutants: Performance and mechanism. *Chemosphere*, 2021, **273**, 129643.
  9. C. H. Wu, J. T. Lin, K. A. Lin, Magnetic cobaltic nanoparticle-anchored carbon nanocomposite derived from cobalt-dipicolinic acid coordination polymer: An enhanced catalyst for environmental oxidative and reductive reactions. *J. Colloid. Interface. Sci.*, 2018, **517**, 124-133.
  10. M. H. Xu, J. J. Yang, B. Lu, R. F. Chen, S. Wang, H. Liu, Efficient degradation of ciprofloxacin by activated peroxymonosulfate using OV-rich NiCo<sub>4</sub>-LDH: Insights into radical production pathway and catalytic mechanism. *Chem. Eng. J.*, 2023, **461**, 141885.
  11. J. Zhou, W. Liu, W. Cai, The synergistic effect of Ag/AgCl@ZIF-8 modified g-C<sub>3</sub>N<sub>4</sub> composite and peroxymonosulfate for the enhanced visible-light photocatalytic degradation of levofloxacin. *Sci. Total. Environ.*, 2019, **696**, 133962.
  12. W. Xie, Y. Yuan, J.-J. Wang, S.-R. Zhang, G.-J. Xu, N. Jiang, Y.-H. Xu, Z.-M. Su, Co-based MOF heterogeneous catalyst for the efficient degradation of organic dye via peroxymonosulfate activation. *Dalton Trans.*, 2023, **52**, 14852-14858.
